# Supplementary material for: Identification of an Extracellular Endoglucanase That Is Required for Full Virulence in Xanthomonas citri subsp. citri
Source: PubMed Central journal article supplement (PMC4780785; doi:10.1371/journal.pone.0151017), 2016-03-07

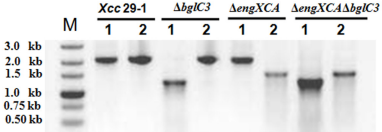

Supplement: pone.0151017.s002.pdf [file pone.0151017.s002.pdf]
